# Supplementary material
Source: PubMed Central journal article supplement (PMC4484744)

1 **SUPPLEMENTAL FIGURE LEGENDS**

2 **Figure S1 is related to Figure 1. *Dbx1* expression in *Dbx1<sup>CKO</sup>* embryonic telencephalon**

3 (A-C) Schematic of coronal view of the embryonic forebrain at the level of the septum (A),  
4 ventral pallidum (VP) (B) and preoptic area (POA) (C).

5 At E11.5, expression of *Dbx1* in developing septum and amygdala (VP and POA; Hirata et al.,  
6 2009) is unchanged between Ctrl (A.i-C.i) and *Dbx1<sup>CKO</sup>* (A.ii-C.ii) embryos.

7 The scale bar represents 500  $\mu$ m.

8  
9 **Figure S2 is related to Figure 2. Calbindin and Bat-Gal are co-expressed in embryonic**  
10 ***Dbx1<sup>CKO</sup>* LH neurons**

11 (A) Schematic of coronal views of the embryonic forebrain at the level of the LH with a red box  
12 indicating areas of corresponding immunohistochemical low magnification images in panels B  
13 and C.

14 (B-C.iii) Wnt-responsive Bat-Gal cells (green) and Calbindin+ (purple) cells in the LH of E15.5  
15 *Dbx1<sup>+/+</sup>;BAT-GAL<sup>+/-</sup>* (B-B.iii) and *Dbx1<sup>-/-</sup>;BAT-GAL<sup>+/-</sup>* (C-C.iii) embryos. Arrowheads indicate co-  
16 labeled cells.

17 (D-F) Significant increases in the number of Wnt-responsive Bat-Gal+ cells co-labeling with  
18 Calbindin expression (D), the percent of co-labeled cells with respect to the total number of  
19 Calbindin+ cells (E) or the total number of Bat-Gal+ cells (F) are observed in the LH of E15.5  
20 *Dbx1<sup>-/-</sup>;BAT-GAL<sup>+/-</sup>* embryos.

21 Mean  $\pm$  SEM, n = 3, \*p value < 0.05. The scale bar represents 50  $\mu$ m in panels B and C and 15  
22  $\mu$ m in panels Bi-C.iii.

23  
24 **Figure S3 is related to Figure 2. Expression of embryonic PVN, VMH and PMN markers is**  
25 **unchanged in *Dbx1<sup>CKO</sup>* and *Dbx1<sup>-/-</sup>* embryos**

26 (A, E, I) Schematic of a coronal view of the embryonic forebrain at the level of the PVN (A),  
27 VMH (E) and PMN (I) with a red box indicating the areas of corresponding ISH images.  
28 No changes are observed in expression of *Avp*, *Sim1* and *Oxt* in the E17.5 PVN (B-D.ii); *Fezf1*,  
29 *Nr5a1* and *Lef1* in the E13.5 VMH (F-H.ii); or *Lef1* and *Sim1* in the E13.5 PMN (J-K.ii) in  
30 *Dbx1<sup>CKO</sup>* or *Dbx1<sup>-/-</sup>* brains.

31 Mean  $\pm$  SEM; n = 3 - 6 per experimental group; all p values > 0.05 in comparisons between  
32 comparable groups for each probe. The scale bar represents 500  $\mu$ m.

33

34 **Figure S4 is related to Figure 3. Differential loss and sparing of Arc and LH protein**  
35 **expression in *Dbx1<sup>CKO</sup>* postnatal males and females**

36 (A-F) Schematic of rostral to caudal coronal views of the postnatal brain with a red box  
37 indicating areas of corresponding immunohistochemical images taken under the same exposure  
38 conditions.

39 (A.i-F.i) Terminals of *Agrp+* axons are present in multiple limbic nuclei in Ctrl mice at P21.

40 (A.ii-F.ii) *Dbx1<sup>CKO</sup>* brains show dramatically diminished *Agrp+* terminals across all projection  
41 targets at P21.

42 (G) Summary diagram illustrating the requirement of *Dbx1* for *Agrp+* projections.

43 Abbreviations: BNST (bed nucleus of stria terminalis); CeA (central amygdala); mPO (medial  
44 preoptic nucleus).

45 (H-J) In the Arc, no changes in expression of *Pomc* (H-H.ii), *Cart* (I-I.ii), or *TH* (J-J.ii) are  
46 observed at P21.

47 (K-M) In the LH, there is a significant decrease in the number of cells expressing *Pmch* (K-K.ii),  
48 *Nesfatin* (L-L.ii), or *Cart* (M-M.ii) in both male and female *Dbx1<sup>CKO</sup>* mice at P21.

49 Mean  $\pm$  SEM; n = 3 per sex, per experimental group; \*, p value < 0.05; \*\*, p < 0.01.

50 The scale bar represents 250  $\mu$ m in panels A.i-F.ii and 100  $\mu$ m in panels H-M.i.

51

52 **Figure S5 is related to Figure 3. Expression of postnatal PVN, VMH and PMN markers is**  
53 **unchanged in *Dbx1<sup>CKO</sup>* postnatal male and female mice**

54 (A, E, I) Schematic of a coronal view of the postnatal brain at the level of the PVN (A), VMH (E)  
55 and PMN (I) with a red box indicating corresponding areas of ISH images.

56 (B-D.iv) No changes are observed in expression of *Avp*, *Sim1* and *Oxt* in the PVN (B-D.ii); *Fezf1*,  
57 *Nr5a1* and *Lef1* in the VMH (F-H.ii); or *Lef1* and *Sim1* in the PMN (J-K.ii) in *Dbx1<sup>CKO</sup>* males or  
58 females at P21.

59 Mean  $\pm$  SEM; n = 3 - 6 per experimental group; all p values > 0.05 in comparisons between  
60 comparable groups for each probe. The scale bar represents 250  $\mu$ m.

61

62 **Figure S6 is related to Figure 5. Stress-feeding circuit connectivity and c-Fos expression**  
63 **in *Dbx1<sup>CKO</sup>* mice after food stress**

64 (A) Schematic of the dual AAV injection paradigm employed to label neurons in the LH  
65 projecting to the PVN.

66 (B) Expression of WGA-Cre helper virus (red) in the PVN.

67 (C, D, E) Low magnification (C) and high magnification (D, E) images of the LH with cells  
68 positive for the cre-dependent AAV virus carrying the floxed-stop YFP reporter (green).

69 (D.i-E.ii) High magnification of Pmch+ (D.i) and Hcrt+ (E.i) neurons co-labeling with the AAV-  
70 YFP reporter (D.ii and E.ii, respectively). Arrowheads indicate co-labeled neurons.

71 (F-H) Schematic of a coronal view of the postnatal brain at the level of the Arc (F), LH (G) and  
72 PVN (H) with a red box indicating corresponding areas of IHC images.

73 (F-H.iv) Representative images of c-Fos expression in the Arc, LH and PVN in a fed state (mice  
74 given regular chow diet *ad libitum*) (F.i-H.i and F.iii-H.iii) or 12 hr after fasting (F.ii-H.ii and F.iv-  
75 H.iv) in Ctrl (F.i-H.ii) and *Dbx1<sup>CKO</sup>* (F.iii-H.iv) mice.

76 (I-N) Significant increases in the number of c-Fos+ cells in fasted Ctrl males and females  
77 compared to fed Ctrl are observed in the Arc (I, L), LH (J, M) and PVN (K, N) (white bars), with

78 no change in the number of c-Fos+ cells in female *Dbx1<sup>ckO</sup>* Arc (L), male and female LH (J, M)  
79 and female PVN (N) (black and gray bars). The fold change in c-Fos+ cells after fasting is  
80 significantly lower in *Dbx1<sup>ckO</sup>* male and female Arc (L.i, O.i), LH (M.i, P.i) and PVN (N.i, Q.i).  
81 Mean  $\pm$  SEM; n= 3-11, \*p value < 0.05, \*\*p<0.01, \*\*\*p<0.001

82

83 **Figure S7 is related to Figure 6. Body length, metabolism and body fat composition is**  
84 **unchanged in *Dbx1<sup>ckO</sup>* male and female mice on a regular chow diet**

85 (A-D) Body length throughout post-weaning ages is unchanged in *Dbx1<sup>ckO</sup>* males and females.

86 No significant changes in oxygen consumption (E, H), carbon dioxide production (F, I), heat  
87 production (G, J), fat mass (K, N), lean mass (L, O), or percent body fat (M, P) are observed in  
88 P30 *Dbx1<sup>ckO</sup>* males and females fed a regular chow diet.

89 Mean  $\pm$  SEM; n = 9 - 15 per experimental group; all p values > 0.05 in comparisons between  
90 Ctrl and *Dbx1<sup>ckO</sup>* in comparable measurements.

91

92 **Figure S8 is related to Figure 7. Unchanged innate behaviors in *Dbx1<sup>ckO</sup>* males and**  
93 **females**

94 The following behaviors showed no significant differences between *Dbx1<sup>ckO</sup>* and Ctrl mice:

95 male (A-C; n = 31 - 32) or female (I-K; n = 15 - 21) mating behaviors. Only one ejaculation event  
96 was observed in each group (A and I).

97 Male territorial aggression (D-F; n = 23 - 24) or female maternal aggression (L-N; n = 8 - 10).

98 Olfaction in males (G) or females (O) (n = 10 - 13).

99 Urine marking in males (H) or females (P) (n = 6 - 10).

100 (Q) Pup retrieval in females (n = 8 - 10).

101 Mean  $\pm$  SEM. All p values > 0.05 in comparisons between Ctrl and *Dbx1<sup>ckO</sup>* in comparable  
102 measurements.

103

104 **Supplemental Movie.**

105 Video clip showing behavior of female Ctrl and *Dbx1<sup>CKO</sup>* mice in the presence of rat bedding.

106 Video from each group was taken during the first three minutes of recording.

107

108 **Table S1.**

109 List of gene changes  $\geq 2.0$  fold in the embryonic and postnatal male and female *Dbx1<sup>CKO</sup>*

110 hypothalamus.

111

112 **Table S2.**

113 List of probes used to validate microarray screens.

## 114 SUPPLEMENTAL EXPERIMENTAL PROCEDURES

115

### 116 **Animals**

117 Mice were housed in the temperature- and light-controlled Children's National Medical Center  
118 animal care facility and given food and water *ad libitum*, unless otherwise stated. All animal  
119 procedures were approved by Children's National Medical Center's and the University of  
120 Pennsylvania's Institutional Animal Care and Utilization Committees (IACUC) and conformed to  
121 NIH Guidelines for animal use. Conditional-knockout mice ( $Dbx1^{cKO}; Nkx2.1Cre^{+/-}; Dbx1^{c/-}$ ) and  
122 controls (Ctrl:  $Nkx2.1Cre^{+/-}; Dbx1^{c/+}$ ) were obtained by crossing  $Nkx2.1Cre^{+/-}; Dbx1^{+/-}$  males with  
123  $Dbx1^{flox/flox}$  females.  $Dbx1$  knockout mice (KO:  $Dbx1^{-/-}$ ) and controls (WT:  $Dbx1^{+/+}$  and Het:  
124  $Dbx1^{+/-}$ ) were obtained by crossing male and female  $Dbx1^{+/-}$  mice. For analysis of Wnt-  
125 responsive cells, we carried out the above crosses with BAT-GAL transgenic mice (Jackson  
126 Labs strain *B6.Cg-Tg(BAT-lacZ)3Picc/J*) (Maretto et al., 2003). Mice were genotyped by  
127 Transnetyx Inc. Genotyping Services.

128

### 129 **Gene Expression Profiling**

#### 130 ***RNA samples quantity and quality***

131 E13.5 hypothalamic primordium or postnatal (3-4 month old) hypothalamic tissue was  
132 microdissected from 3 Ctrl and 3  $Dbx1^{cKO}$  embryos from adult male and female mice (24  
133 samples total) using Lumsden scissors in ice cold PBS (regions of dissections shown in **Figure**  
134 **1H-I**). Embryos were sexed using PCR to amplify the Y-chromosome-specific *Sry* gene. RNA  
135 was isolated using a Qiagen kit (RNeasy kit 74104). RNA concentration of each sample was  
136 determined by NanoDrop® spectrophotometer ND-1000 (NanoDrop Technologies, Wilmington,  
137 DE). The quality of RNA samples was confirmed via RNA Integrity Number (RIN>6) with  
138 NanoChips on the Agilent 2100 Bioanalyzer (Agilent Technologies Inc., Santa Clara, CA).

139

140 **Microarray**

141 An aliquot of 200 ng of high-quality total RNA from each sample was used for expression  
142 profiling using Illumina® Gene Expression BeadChip Array technology (Illumina, Inc., San Diego,  
143 CA). Reverse Transcription of the first cDNA strand and synthesis of the second strand,  
144 followed by a single *in vitro* transcription (IVT) amplification, incorporating biotin-labeled  
145 nucleotides, were performed with Illumina® TotalPrep™ -96 RNA Amplification Kit (Ambion,  
146 Austin, TX), following the manufacturer's instructions. Quality of the amplified and labeled RNA  
147 (aRNA) was assessed with Bioanalyzer, and 1.5 µg of the IVT product was hybridized to  
148 Illumina MouseWG-6v2\_BeadChip for 16 hr, followed by washing, blocking and streptavidin-Cy3  
149 staining according to the Illumina Whole-Genome Gene Expression Direct Hybridization  
150 protocol. Arrays were scanned using Illumina HiScanSQ System, and the obtained decoded  
151 images were analyzed by GenomeStudio™ Gene Expression Module – Illumina integrated  
152 platform for the data visualization and analysis.

153

154 **Expression values data generation**

155 Generated in GenomeStudio, Illumina probe sets signal intensity values were uploaded (using  
156 Genome Studio *plug-in* option) into the Partek Genomics Suite, version 6.5 (Partek  
157 Incorporated, St. Louis, MO) to determine differently expressed genes, statistics analyses and  
158 data visualization. Partek automatically applies Robust Multi-array Average (RMA) and performs  
159 *log2* transformation for the generated expression values. One-way ANOVA statistical test was  
160 applied to the profiles to verify significance of the comparative results. Only expression values  
161 with a *p*-value cut off of  $p < 0.05$  and fold change  $> 1.5$  were considered for further analyses.

162

163 ***In situ* hybridization (ISH) and LacZ staining**

164 Postnatal animals (P21 and P90) and embryos  $\geq E15$  were transcardially perfused with 4%  
165 paraformaldehyde (PFA) (wt/vol). E13.5 - 17.5 embryo and postnatal tissue was drop fixed with

166 4% PFA for 2 hr at 4°C, dehydrated in 30% sucrose (wt/vol), embedded in OCT embedding  
167 compound, and sectioned at 20 µm using a microtome cryostat (Leica HM525). Both control and  
168 mutant sections were mounted on the same slide for direct comparison. For *ISH*, sections were  
169 refixed with 4% PFA, treated with proteinase K, again refixed with 4% PFA, treated with  
170 triethanolamine containing acetic anhydride, and then hybridized with digoxigenin-UTP–labeled  
171 RNA probes overnight. The next day, the probes were washed with 2x SSC at 65°C. Signals  
172 were detected with an antibody to digoxigenin (Roche #11093274910) and BM purple (Roche  
173 #11442074001) (See **Table S2** for details of probes). For LacZ staining, E17.5 and E15.5  
174 *Dbx1<sup>CKO</sup>;BAT-GAL* and *Dbx1<sup>-/-</sup>;BAT-GAL* sections (with appropriate control sections on the same  
175 slide) were incubated in X-gal staining solution overnight at 37°C. For signal quantitation,  
176 positive puncta were counted in every 10<sup>th</sup> serial coronal section encompassing the entire  
177 anterior to posterior gene expression domain. Where positive puncta could not be counted,  
178 ImageJ was used to quantify positive signal by calculating total area of signal multiplied by the  
179 average intensity of signal (total area x mean pixel intensity) in gene expression domains of a  
180 section; every 10<sup>th</sup> section was quantified and added. Data from embryonic males and females  
181 were grouped, since no differences were detected between sexes. Data from *Dbx1<sup>+/+</sup>* (WT) and  
182 *Dbx1<sup>+/-</sup>* (Het) embryos were grouped, as no differences were detected between genotypes.  
183 Data was then presented as a percent (%) of control. Minimum n = 3 mice per sex, per  
184 genotype. Individual sample sizes (n) are noted in legends for **Figures 2-7** and **S4-S8**.

185

### 186 **Immunohistochemistry (IHC)**

187 Postnatal mice were perfused and postfixed with 4% PFA (wt/vol) for 16 hr at 4°C, then  
188 sectioned at 50 µm with a vibrating microtome (Leica VT1000S). For IHC, sections were  
189 incubated with the primary antibody for 16 hr at 4°C, washed and incubated with the  
190 corresponding fluorescent secondary antibodies, and mounted with DAPI Fluoromount  
191 (SouthernBiotech 0100-20). Primary antibodies used were rat anti-GFP (to detect YFP



192 expression, 1:1000, Nacalai 04404-84), sheep anti-Nesfatin (1:500, R&D Systems af6895),  
193 rabbit anti-Cart (1:20,000, Phoenix Pharmaceuticals), rabbit anti-TH (1:500, Santa Cruz  
194 sc14007), goat anti-Agrp (1:500, R&D Systems af634), goat anti-Pmch (1:500, Santa Cruz  
195 sc14509), rabbit anti-Hcrt (1:100, Millipore ab3096), goat anti-Pomc (1:100, Abcam ab322893),  
196 goat anti-Calbindin (1:500, Santa Cruz sc-7691) and rabbit anti-c-Fos (1:500, Santa Cruz sc-52).  
197 Quantification of total cells was obtained by counting positive cells (as determined by co-  
198 localization with DAPI) in every 6<sup>th</sup> serial coronal section of *Dbx1<sup>CKO</sup>* and Ctrl, encompassing the  
199 entire domain of expression. Minimum n = 3 mice per sex, per genotype.

200

### 201 **Stereotactic injection of viral tracers**

202 The animals were anesthetized with intraperitoneal injections of a ketamine (80 mg/kg)/xylazine  
203 (15–20 mg/kg) cocktail (Sigma). As previously described (Gradinaru et al., 2010) the WGA-Cre  
204 AAV virus (AAV2-EF1 $\alpha$ -mCherry-IRES-WGA-Cre; UNC vector core) was delivered into the PVN  
205 via a borosilicate glass pipette; the injection volume and flow rate (100 nl at 10 nl/min) were  
206 controlled with a pico injector (Harvard Apparatus). Five weeks later, the Cre-dependent AAV  
207 (pAAV-Ef1 $\alpha$ -DIO EYFP; UNC vector core) was injected into the ipsilateral LH of the same  
208 animal. Coordinates used (relative to bregma) were -0.8/0.2/4.5 mm for the PVN and -1.5/1/4.8  
209 mm or the LH. The glass pipette was left in place for 10 min after vector delivery and then was  
210 slowly withdrawn, to allow complete diffusion of the virus and avoid spillover or contamination of  
211 adjacent regions during pipette extraction.

212

### 213 **Multiple Electrode Array Electrophysiology**

#### 214 ***Preparation of Acute Brain Slices***

215 Ctrl and *Dbx1<sup>CKO</sup>* male mice (P17-20) mice were anesthetized with isoflurane and transcardially  
216 perfused with 10 mL of ice-cold carbogenated (95% O<sub>2</sub>, 5 % CO<sub>2</sub>) HEPES-buffered artificial

217 cerebrospinal fluid (aCSF; composition, in mM: 92 NaCl, 2.5 KCl, 1.2 NaH<sub>2</sub>PO<sub>4</sub>•H<sub>2</sub>O, 30  
218 NaHCO<sub>3</sub>, 25 glucose, 20 HEPES, 5 Na-ascorbate, 3 Na-pyruvate, 2 thiourea, 10 MgSO<sub>4</sub>, 0.5  
219 CaCl<sub>2</sub>; pH 7.4). The same aCSF solution was also utilized for perfusion, sectioning, and initial  
220 incubation of all brain slices. Mice were decapitated, and the brains were quickly removed and  
221 affixed to the stage of a vibrating microtome (Leica VT 1200S, Germany). Coronal brain  
222 sections containing the LH were obtained (300 μM thickness, from bregma -2.06 to -2.30 mm).  
223 The slices were incubated at 32°C for 15min. Slices were then transferred to a carbogenated,  
224 low-glucose aCSF (composition, in mM: 126 NaCl, 26 NaHCO<sub>3</sub>, 2.5 KCl, 1.25 NaH<sub>2</sub>PO<sub>4</sub>•H<sub>2</sub>O, 2  
225 MgCl<sub>2</sub>•6H<sub>2</sub>O, 2 CaCl<sub>2</sub>•2H<sub>2</sub>O, 0.2 glucose; pH 7.4) and maintained at ambient temperature (22-  
226 24°C) until experimentation. Sucrose was added to the low-glucose aCSF to maintain osmolality  
227 (295-300 mOsm).

228

### 229 ***Electrophysiological recordings***

230 Brain slices were incubated in oxygenated aCSF at ambient temperature for at least 1 hr before  
231 transfer to a 60-channel, 8 x 8 perforated MEA probe with 200 μM electrode spacing (Multi  
232 Channel Systems, Reutlingen, Germany). The slice was positioned such that the LH was  
233 covered by the array. A constant-vacuum pump was utilized to apply a gentle suction to stabilize  
234 the slice on the MEA probe. The chamber was maintained at 30°C under continuous perfusion  
235 (2 ml/min) of oxygenated, low-glucose (0.2 mM) aCSF for 1 hr prior to data acquisition. A 15-  
236 min recording of spontaneous spiking activity of each slice was acquired. The superfusion  
237 solution was then switched to a high-glucose (5.0 mM) aCSF solution, and a 1-hr recording was  
238 obtained. All recordings were obtained with a 60-channel amplifier (MEA-2100, Multi Channel  
239 Systems, Reutlingen, Germany) running MC Rack software (Multi Channel Systems, Reutlingen,  
240 Germany) at a sampling rate of 25 kHz.

241

### 242 ***Data processing***

243 Event activity was filtered with a 125-Hz high-pass filter. Event detection was set to 5x the root  
244 mean square of the background noise for each channel. Events that surpassed this threshold  
245 were automatically detected utilizing the MC Rack software. Data were arranged into 60-sec  
246 bins, and the maximum spike frequency was calculated for each channel in each experimental  
247 condition.

## 248 **Behavior Assays**

249 All non-feeding behavior assays were video-recorded on digital video cassettes (Sony  
250 DVM60PRRJ) using a Sony MiniDV Digital Handycam (Sony DCRTRV33). Videos were  
251 uploaded as digital WMV files and scored independently by two investigators blind to genotype  
252 using the Scorevideo program for MatLab (Wu et al., 2009).

253

## 254 ***Mating***

255 Sexually naïve experimental males were singly housed and left undisturbed for 1 week prior to  
256 the introduction of a hormonally primed, ovariectomized 129SvEv female. Sexually naïve  
257 hormonally primed ovariectomized experimental females were placed into the home-cage of a  
258 sexually experienced 129SvEv male. Each trial consisted of recordings from the first 30 min of  
259 behavior. Trials were repeated up to three times and separated by at least 1 week, as  
260 previously been described (Xu et al., 2012; Yang et al., 2013). (Male Mating:  $n \geq 31$  per group;  
261 total 63 trials: 32 trials from 11 Ctrl males, 31 trials from 11 *Dbx1<sup>ckO</sup>* males; Female Mating:  $n \geq$   
262 15 per group; total 36 trials: 15 trials from 5 Ctrl females, 21 trials from 7 *Dbx1<sup>ckO</sup>* females).

263

## 264 ***Body Weight, Food Consumption and Body Length***

265 Male and female mice were singly housed after weaning (P21). Weekly, body weight was taken  
266 at the same day and time. Whole chow pellets (regular chow diet; 7012 Teklad LM-485  
267 Mouse/Rat Sterilizable Diet) were weighed to the nearest tenth of a gram, placed in the hopper

268 during weighing of the animal, and re-weighed at the next body-weight measurement. Daily  
269 food consumption was calculated by subtracting the weight of the remaining food from the  
270 amount given and then dividing that difference by seven (n ≥ 9 per group, total 48 mice: 9 male  
271 *Dbx1<sup>CKO</sup>* mice, 9 female *Dbx1<sup>CKO</sup>* mice, 15 Ctrl male mice, 15 Ctrl female mice). Fasting: food  
272 was removed from the hopper for 12 hr. Mice were weighed before and after the 12-hr fast, and  
273 food consumption was measured as the amount of food consumed within the 24 hr following re-  
274 feeding. A single cohort of 20 mice (5 Ctrl males, 5 *Dbx1<sup>CKO</sup>* males, 5 Ctrl females, 5 *Dbx1<sup>CKO</sup>*  
275 females) was used for the different feeding paradigms and was sequentially exposed to 4 weeks  
276 on the regular diet, 2 weeks on the restricted diet, and 7 weeks on the high fat diet. Regular diet:  
277 mice were fed regular chow diet *ad libitum*. Restricted diet: mice were fed regular chow diet  
278 from 17:00 – 12:00 the next day (nineteen hours), and then food was removed for five hours  
279 between 12:00 and 17:00. Body weights were measured daily, and food intake was measured  
280 30 min and 24 hr after food was reintroduced. High-fat diet: mice were fed a special high-fat diet  
281 (Teklad TD.08811) for seven weeks. Body weights and food consumption was measured as  
282 described above. Body length was measured with a ruler from tip of the nose to the base of the  
283 tail in a naturally extended posture.

284

### 285 ***Body composition, Home-cage activity and Metabolic data***

286 These experiments were performed at The Mouse Phenotyping, Physiology and Metabolism  
287 Core at the University of Pennsylvania Diabetes Endocrine Research Center. *Cold tolerance*  
288 *tests*: Implantable electronic transponders (Bio Medic Data Systems, Seaford, DE) were placed  
289 under the skin in the interscapular region of the animals. Temperatures measured by implanted  
290 transponders were recorded at room temperature. Mice were placed at 4° C for 6 hours and  
291 core temperature measured. Core temperature was also measured at room temperature and at  
292 4° C using a rectal thermometer. *NMR*: Lean and fat mass were measured using Echo MRI 3-in-  
293 1 analyzer (Houston, TX). Body weight and fat composition was matched in each subject to give

294 a % fat for each subject. *DEXA*: Bone mineral density was measured using General Electric  
295 Lunar PIXImus2. *CLAMS*: Animal activity monitoring was performed using Columbus Instrument  
296 OXYMAX V4.47.

297

### 298 ***Open Field***

299 Singly housed P160 males and females were placed in the center of a clean open-field  
300 apparatus (Coulbourn Instruments) and recorded for 30 min, as described previously (Bailey  
301 and Crawley, 2009). Time spent in the center field was quantified at 5 min intervals over the 30  
302 min of recording time. (n ≥ 9 per group, total 48 mice: 9 male *Dbx1<sup>ckO</sup>* mice, 9 female *Dbx1<sup>ckO</sup>*  
303 mice, 15 Ctrl male mice, 15 Ctrl female mice).

304

### 305 ***Predator Avoidance***

306 P90 test subjects were video-recorded for 15 min after being given 12 g of clean 1/8" corncob  
307 bedding (Harlan 7092) or corncob bedding from a soiled rat cage. Cardiac blood was taken from  
308 anesthetized animals 45 min after the completion of the assay (1 hr after first exposure to  
309 bedding) for ELISA of plasma Cort levels (n ≥ 11 per group, total 106 mice: 14 male Ctrl  
310 mice+benign bedding, 14 male *Dbx1<sup>ckO</sup>* mice+benign bedding, 13 male Ctrl mice+rat bedding,  
311 14 male *Dbx1<sup>ckO</sup>* mice+rat odor, 13 female Ctrl mice+benign bedding, 12 female *Dbx1<sup>ckO</sup>*  
312 mice+benign bedding, 11 female Ctrl mice+rat bedding, 15 female *Dbx1<sup>ckO</sup>* mice+rat bedding).

313

### 314 ***Territorial Aggression***

315 Adult experimental males were singly housed and left undisturbed for 1 week prior to the  
316 introduction of a smaller 129SvEv intruder male. Each trial consisted of 15 min of recorded  
317 behavior; intruder was removed after each trial. Trials were repeated up to 2 times separated by  
318 at least 1 week, following previous procedures (Yang et al., 2013). (n ≥ 23 per group, total 54  
319 trials: 23 trials from 12 male Ctrl mice, 31 trials from 12 male *Dbx1<sup>ckO</sup>* mice).

320

321 **Maternal Aggression**

322 Singly housed experimental females were mated and allowed to give birth to a litter of pups. On  
323 the day of experimentation, P3-10 pups were removed from the home-cage, and 129SvEv  
324 intruder male was placed into the home-cage. Each trial consisted of 15 min of recorded  
325 behavior, after which the intruder was removed and the pups were returned. Trials were  
326 repeated up to 2 times separated by at least 1 week as previously described (Xu et al., 2012). (n  
327  $\geq$  8 per group, total 18 trials: 8 trials from 4 Ctrl dams, 10 trials from 5 *Dbx1<sup>CKO</sup>* dams).

328

329 **Pup Retrieval**

330 Singly housed experimental females were mated and allowed to give birth to a litter of pups. In  
331 each trial, the dam was temporarily removed from the cage, and the pups (P3-10) were taken  
332 from the nest and placed in a far corner of the home-cage. The dam was returned to the cage,  
333 and the time required for her to retrieve two pups back to the nest was recorded. Trials were  
334 repeated up to 2 times separated by at least 1 week as previously described (Xu et al., 2012). (n  
335  $\geq$  8 per group, total 18 trials: 8 trials from 4 Ctrl dams, 10 trials from 5 *Dbx1<sup>CKO</sup>* dams).

336

337 **Territorial Urine Marking**

338 Bedding was removed from the home-cage and replaced with Whatman chromatography paper  
339 (GE Healthcare, UK 3030-6188), cut to fit the bottom of the home-cage. Test subjects were  
340 placed back in the cage for 1 hr. Urine marking was observed under UV light, and the number  
341 of urine spots was counted. (n  $\geq$  6 per group, total 30 mice: 10 Ctrl males, 8 *Dbx1<sup>CKO</sup>* males, 6  
342 Ctrl females and 6 *Dbx1<sup>CKO</sup>* females).

343

344 **Food Odor**

345 All chow pellets were removed from the test subject's home-cage 12 hr prior to test. On the day  
346 of experimentation, the subject was placed in a clean cage containing 3 cm deep in which a  
347 cookie (Nabisco) was buried 1 cm below the surface in a random corner of the cage. A cookie  
348 was scored as uncovered when it was dug to the surface. (n ≥ 10 per group, total 48 mice: 15  
349 Ctrl males, 13 *Dbx1<sup>ckO</sup>* males, 10 Ctrl females and 10 *Dbx1<sup>ckO</sup>* females).

#### 350 **ELISA**

351 Serum from blood was collected 1 hr after first exposure to bedding (benign or rat). Samples  
352 were run in duplicate using corticosterone ELISA kits (Abcam ab108821) per manufacturer's  
353 recommendations. Values were read on a precision microplate reader (Emax, Molecular  
354 Devices) (n≥11 per group, total 98 mice: 12 male ctrl mice+benign bedding, 13 male *Dbx1<sup>ckO</sup>*  
355 mice+benign bedding, 11 male ctrl mice+rat bedding, 14 male *Dbx1<sup>ckO</sup>* mice+rat odor, 12  
356 female ctrl mice+benign bedding, 13 female *Dbx1<sup>ckO</sup>* mice+benign bedding, 11 female ctrl  
357 mice+rat bedding, 12 female *Dbx1<sup>ckO</sup>* mice+rat bedding).

Figure S1

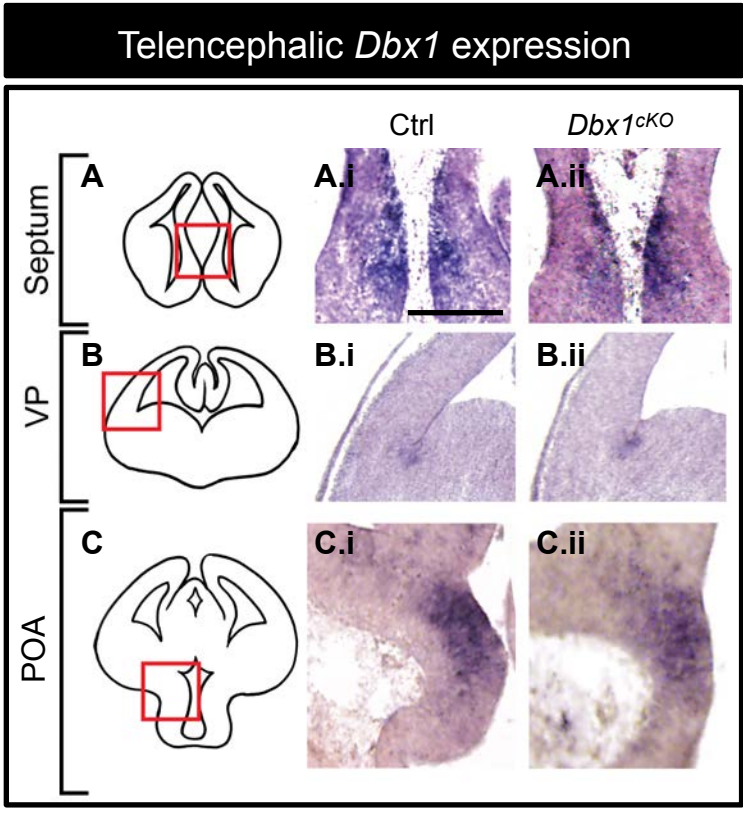



Figure S2

Calbindin is co-expressed in E15.5 Bat-Gal+ LH neurons

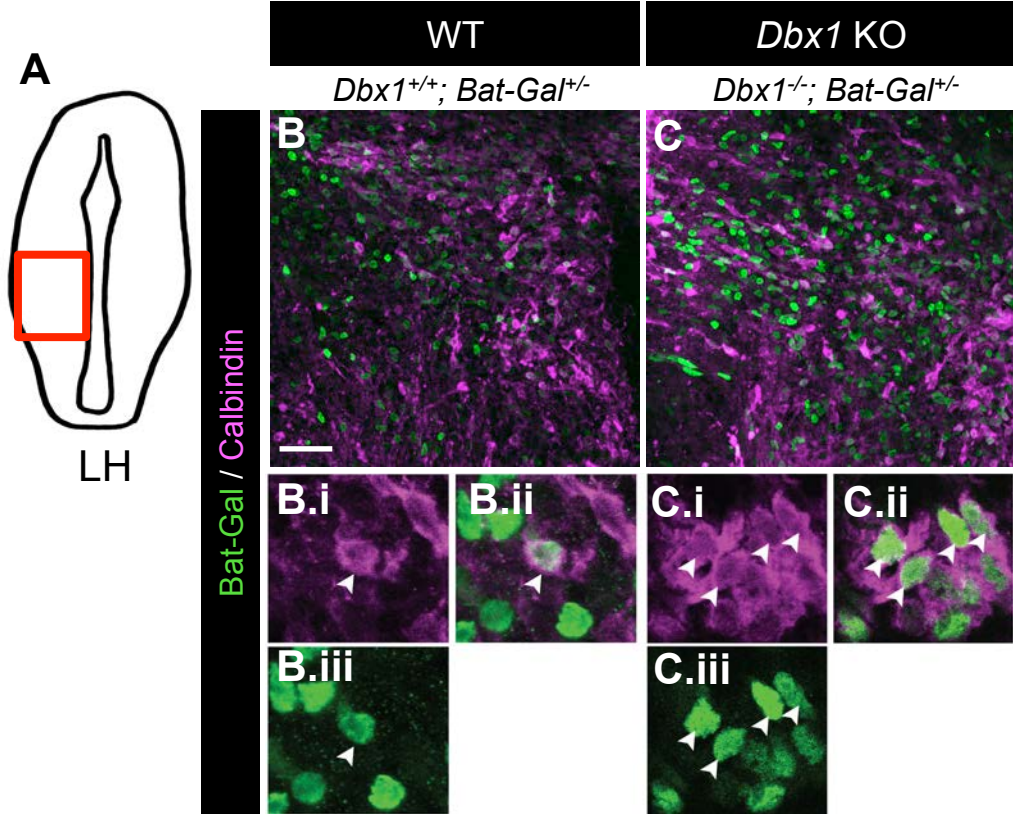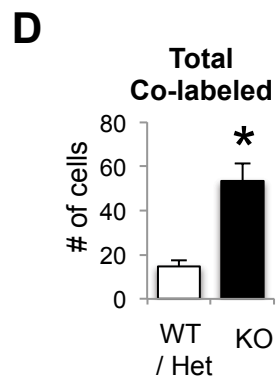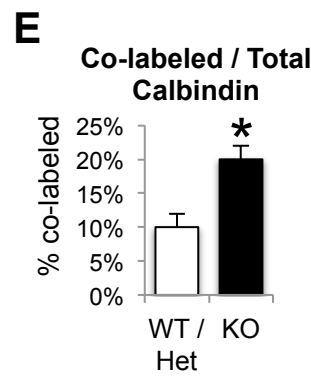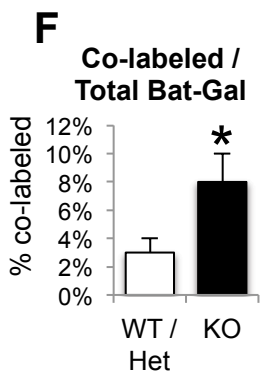

Figure S3

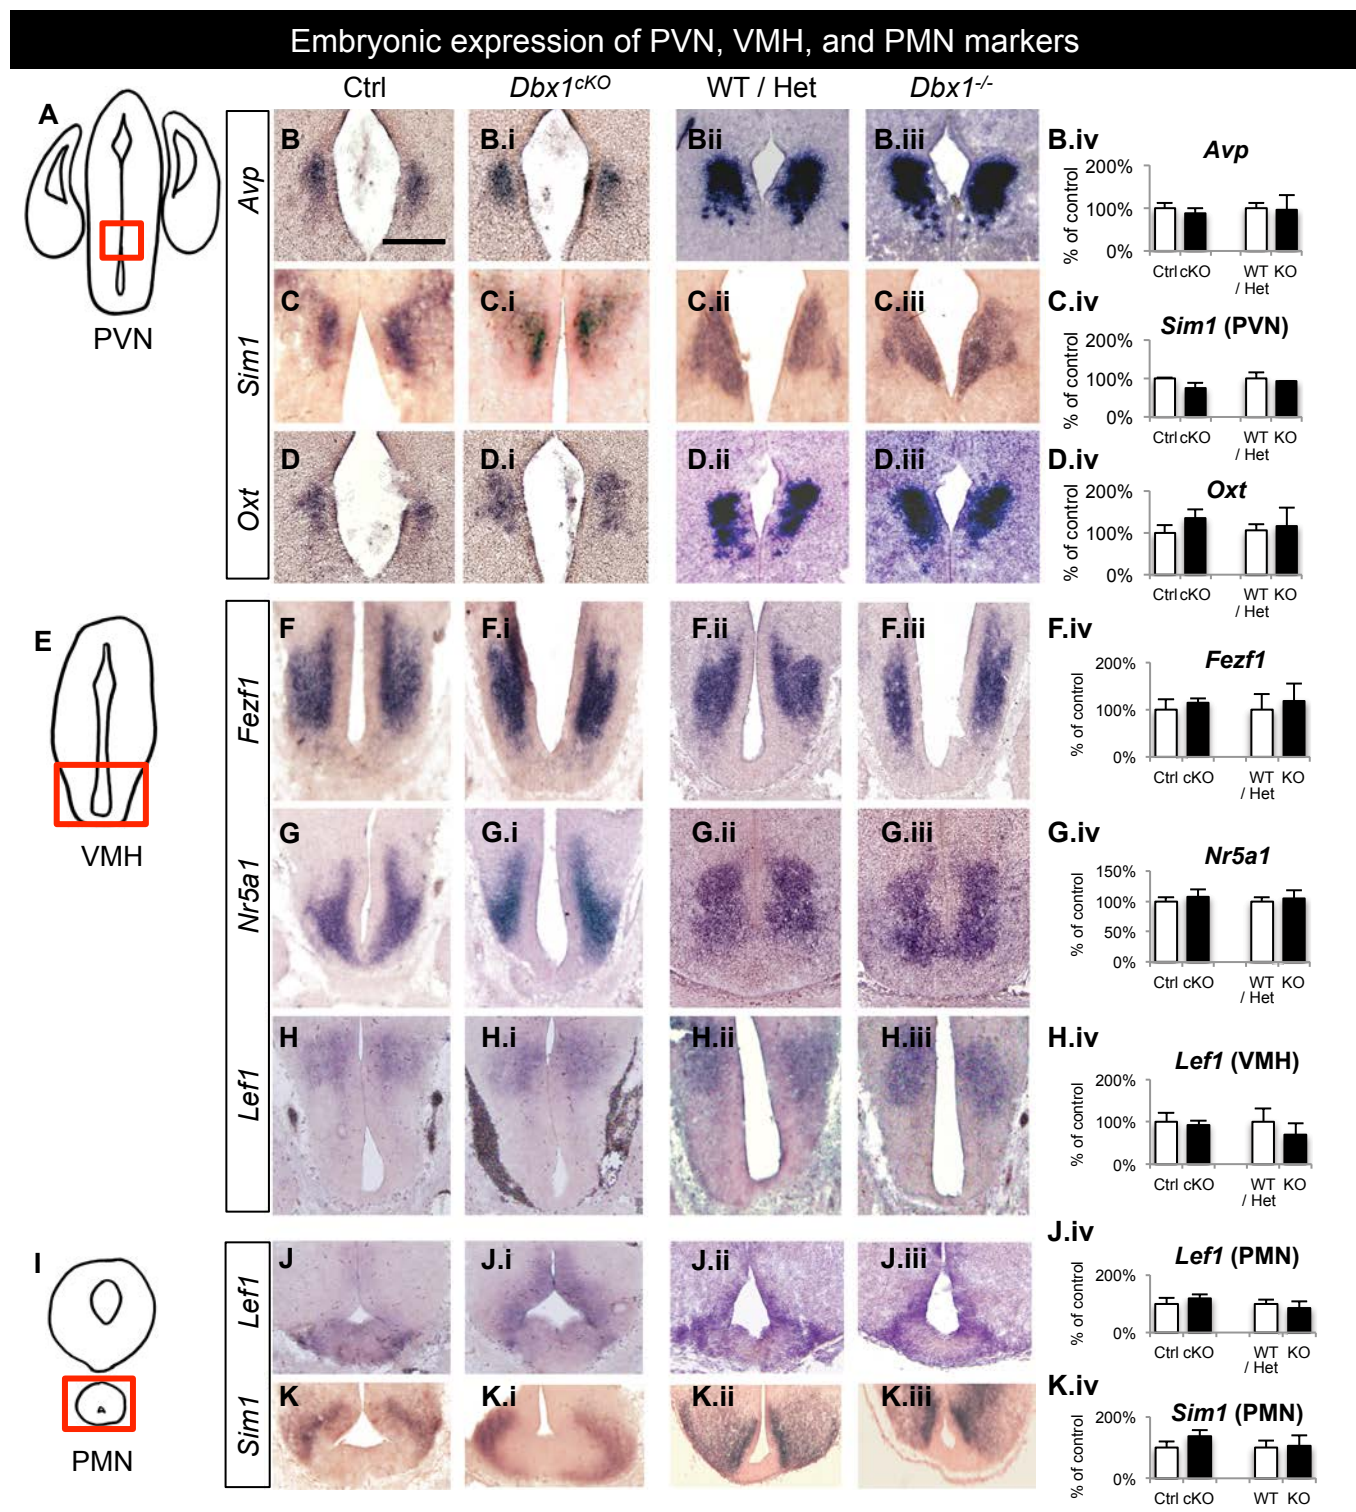

Figure S4

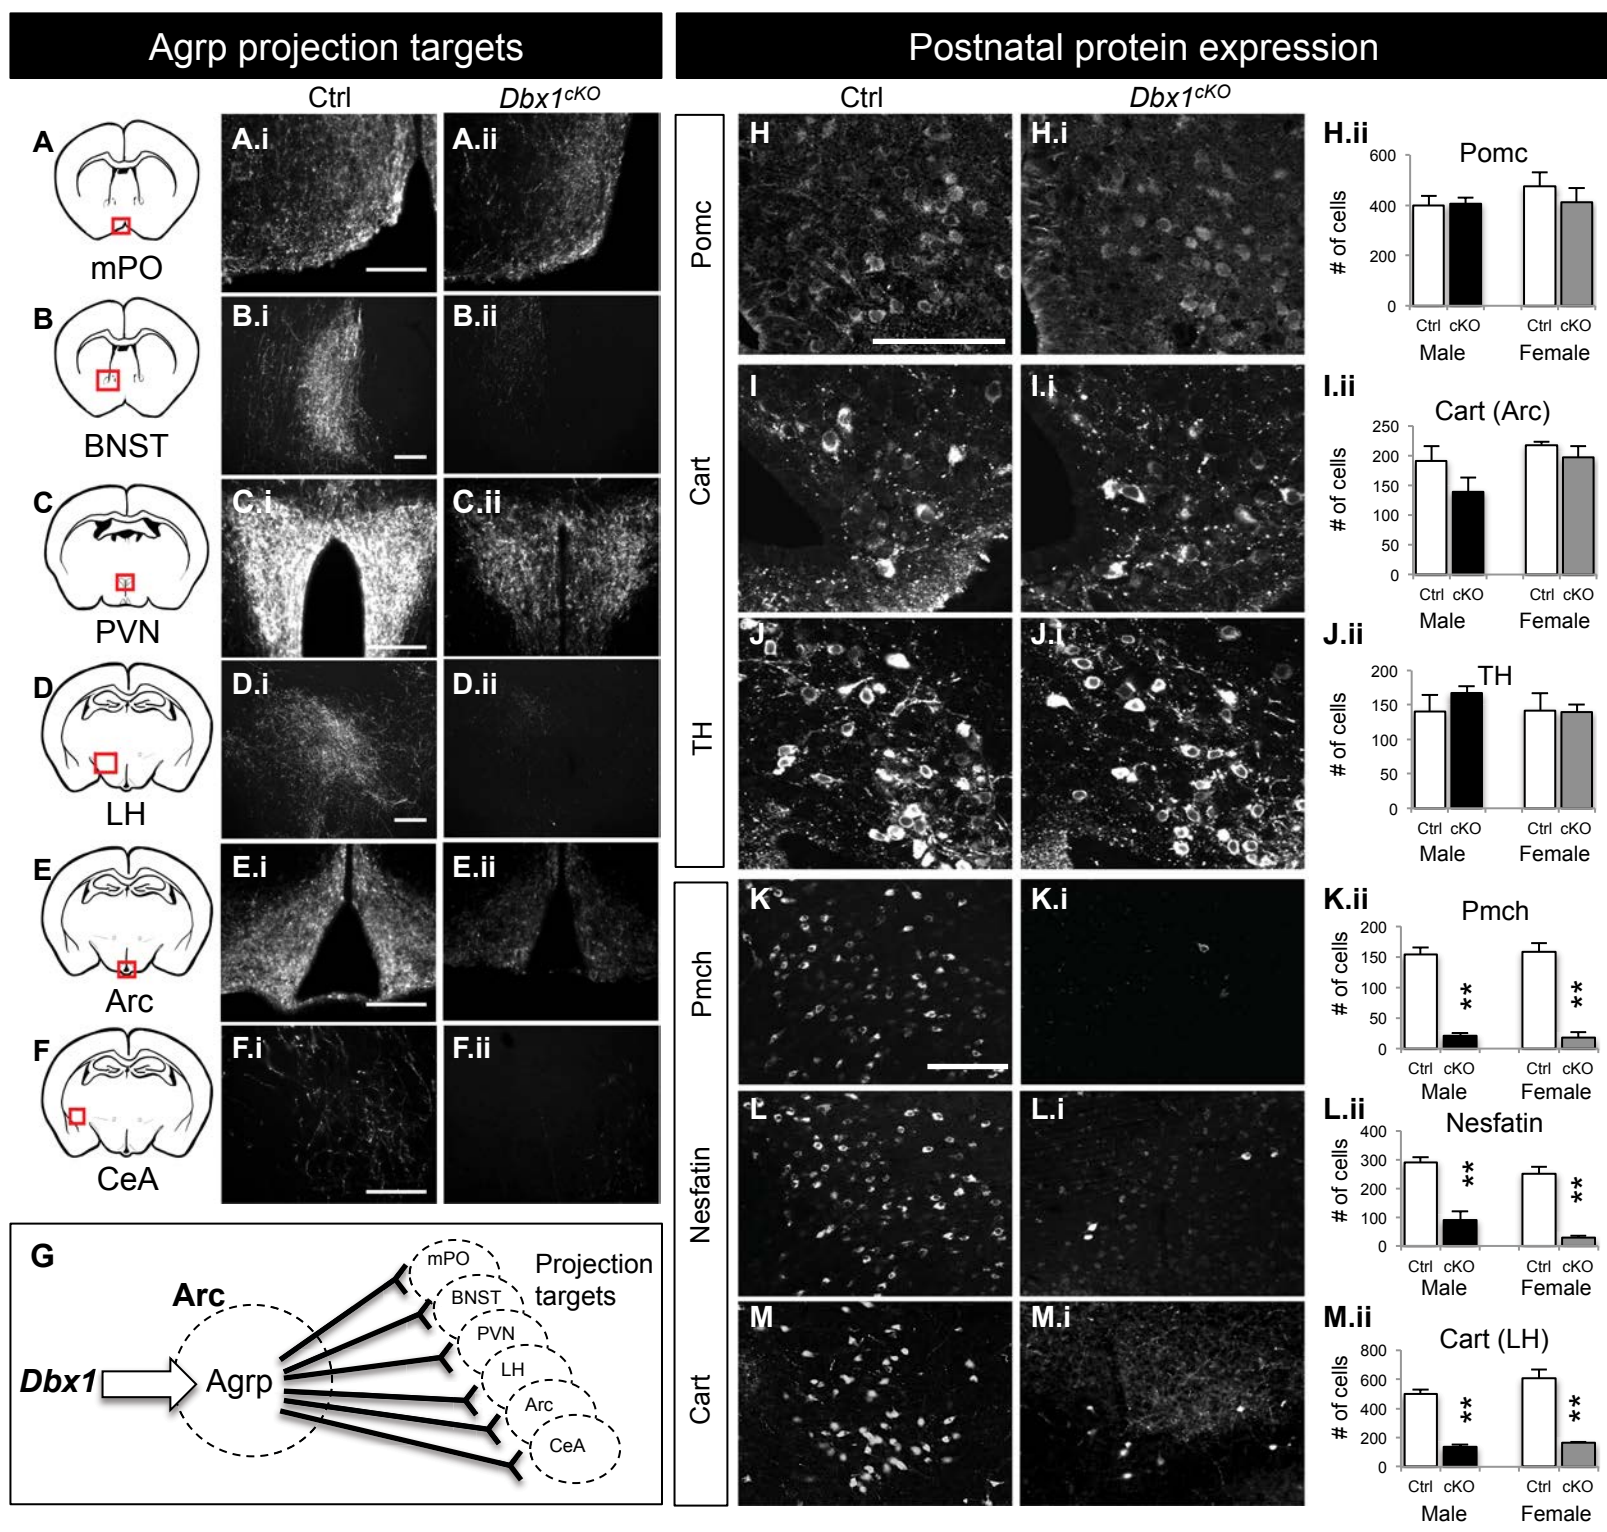

Figure S5

Postnatal markers of PVN, VMH, and PMN in males and females

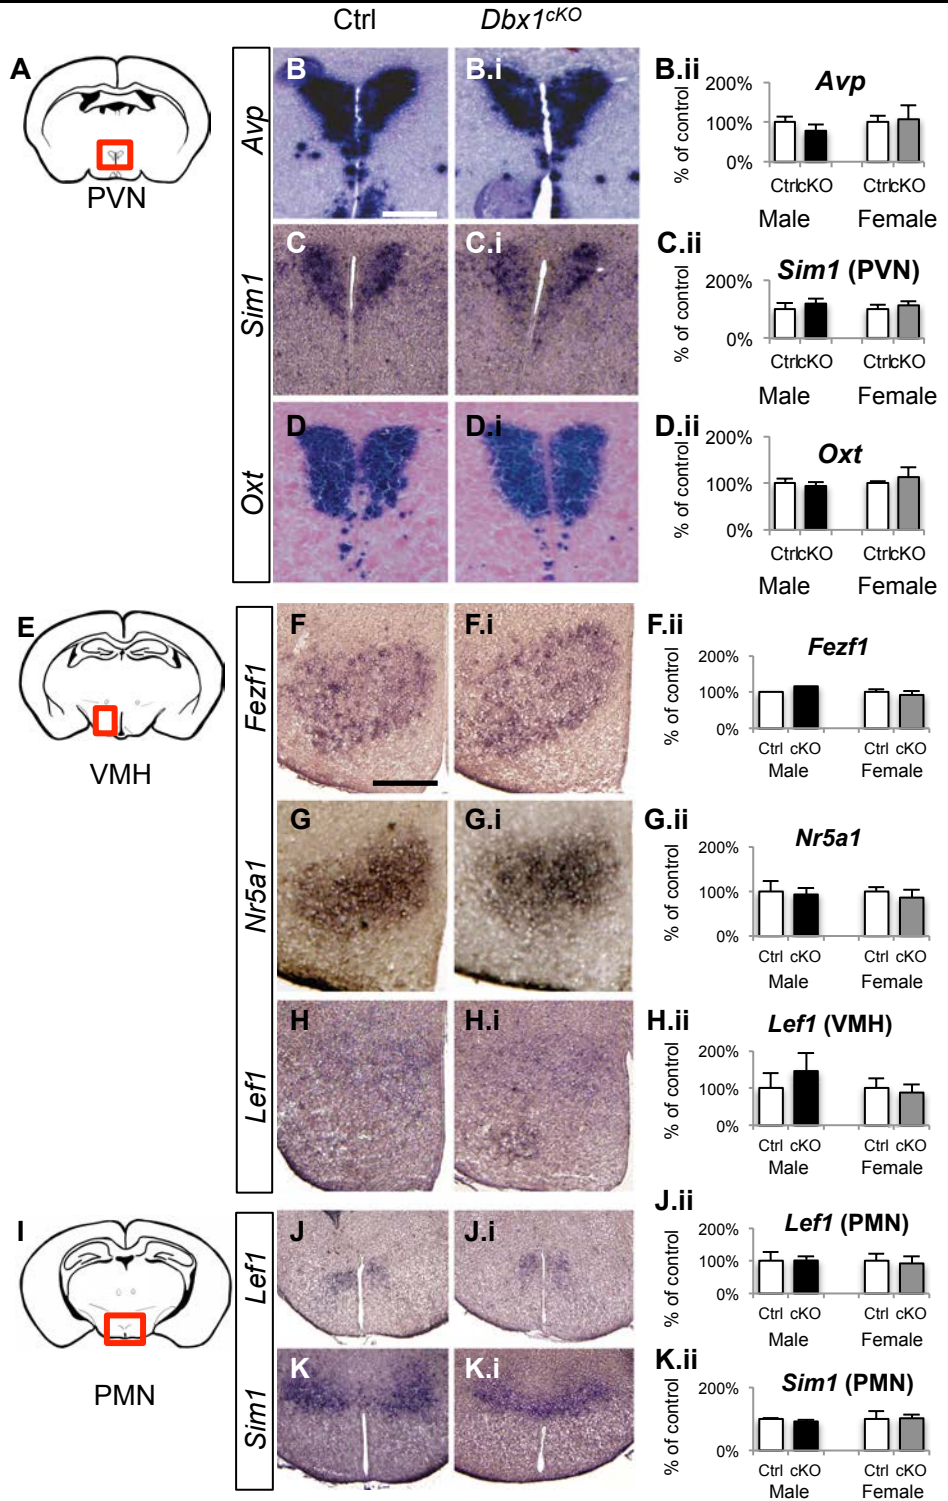

Figure S6

Stress-Feeding Circuit Function

Cre-dependent AAV: PVN ← LH

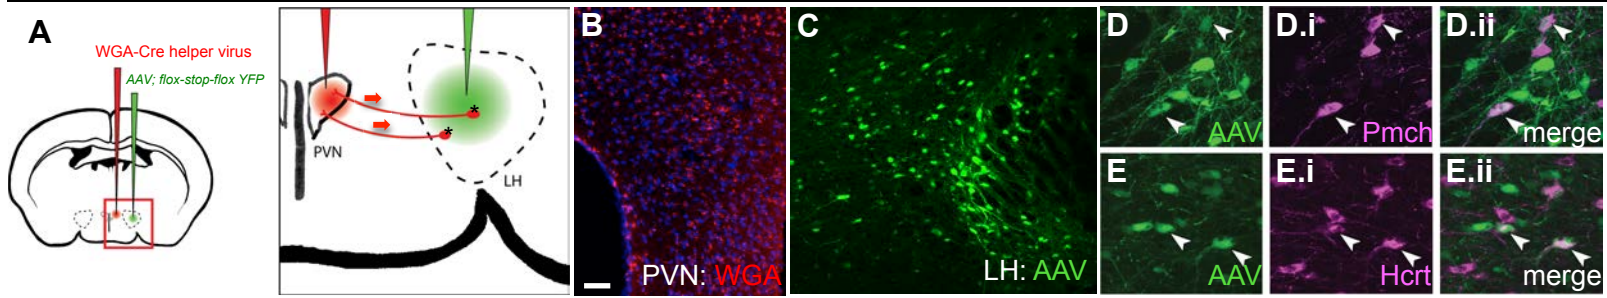

c-Fos activation after fasting

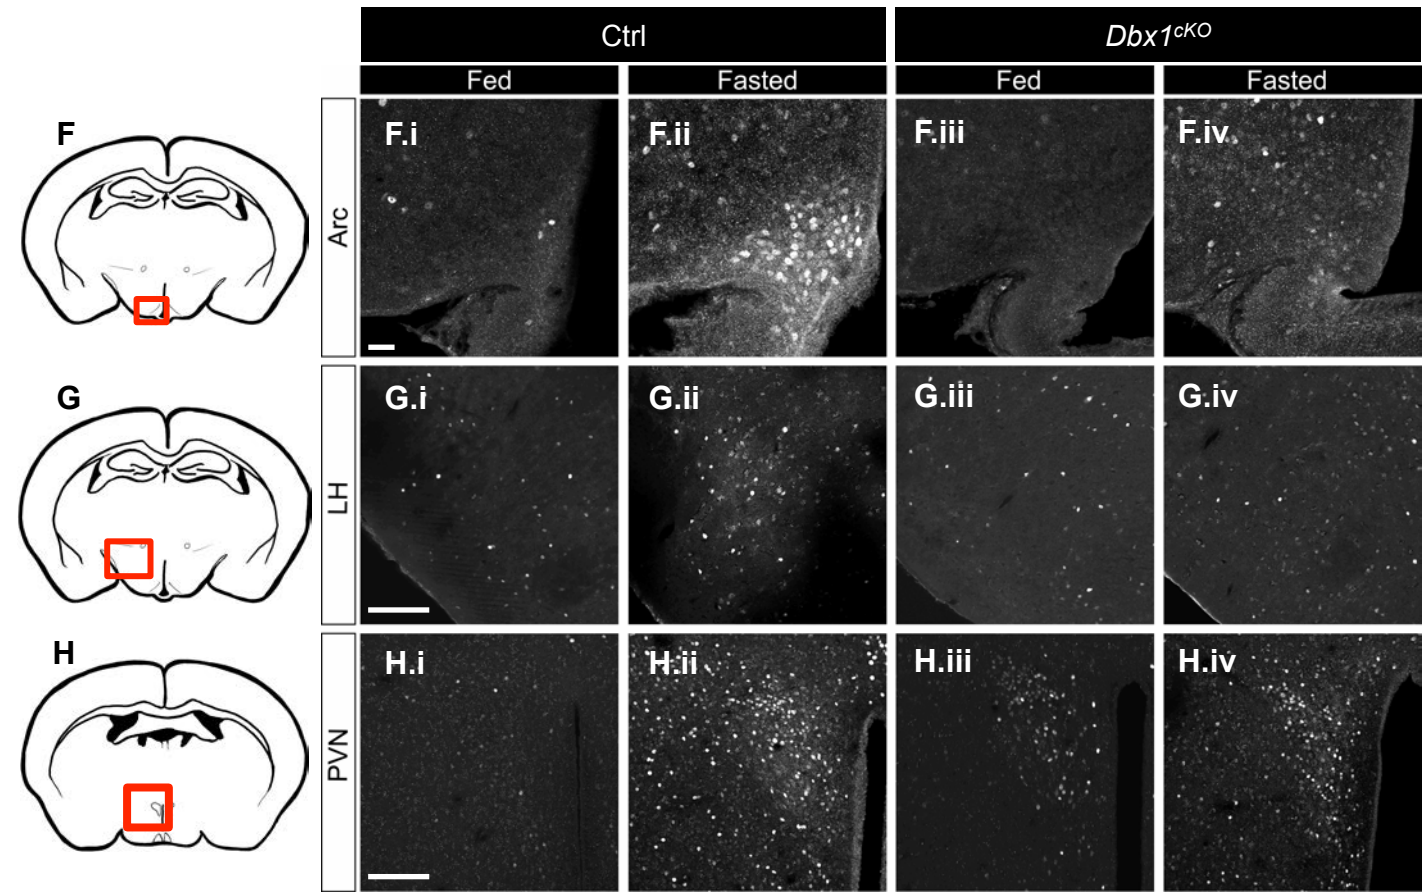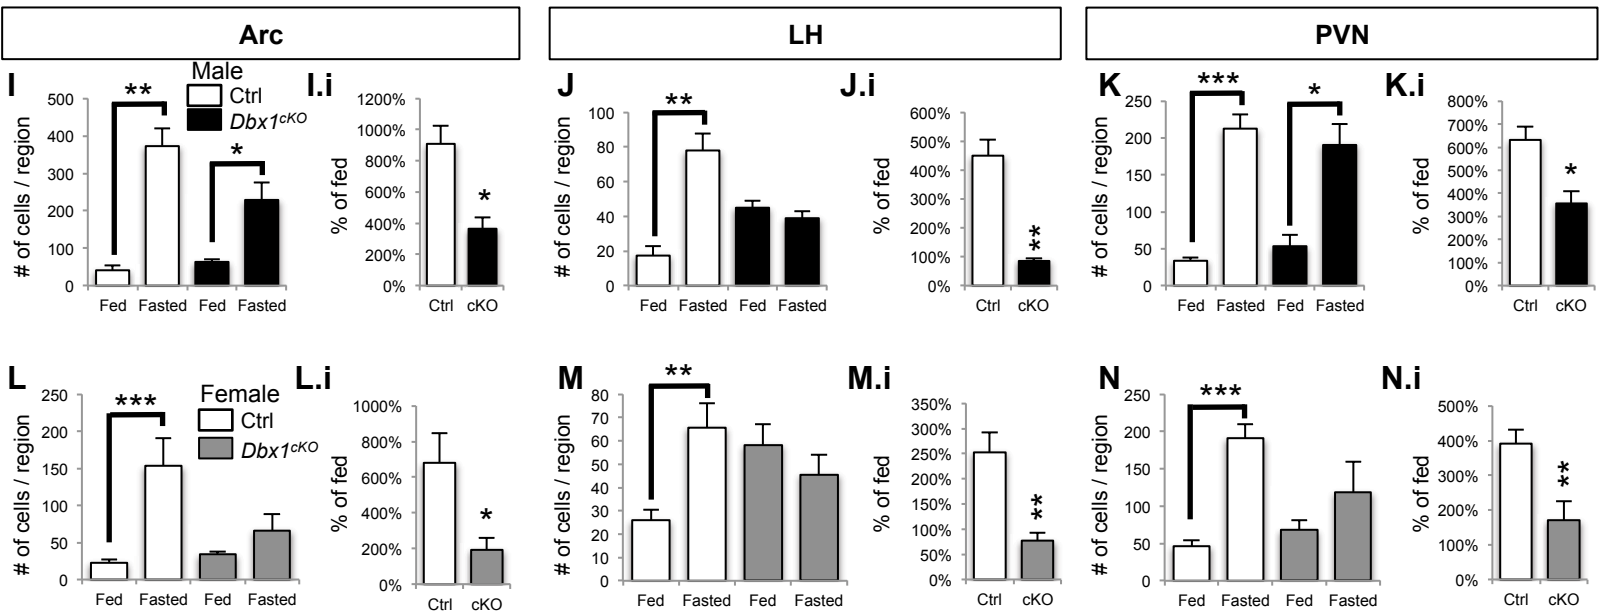

Figure S7

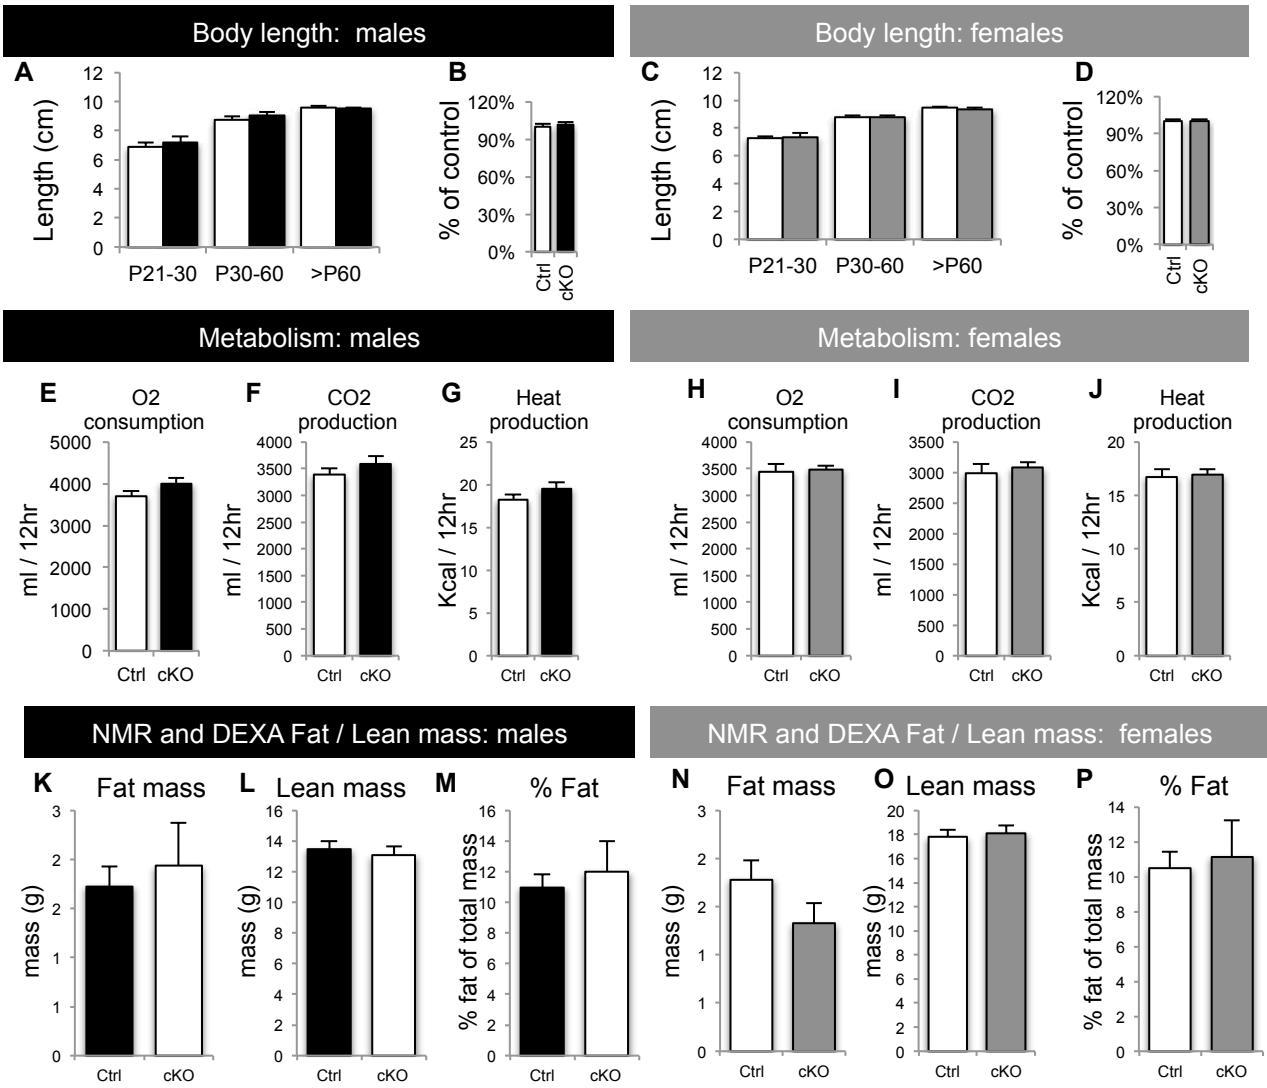

Figure S8

**Male mating behavior**

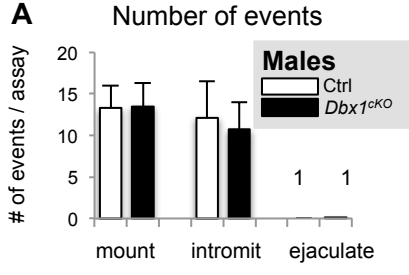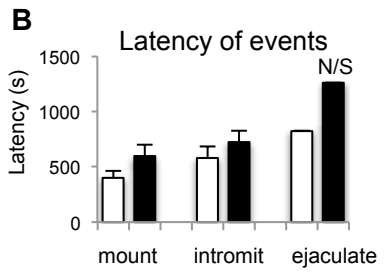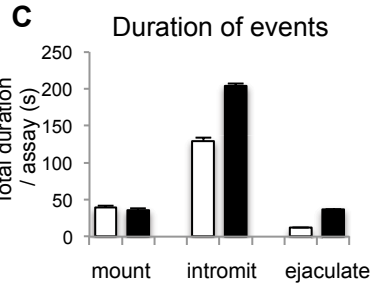

**Male aggression**

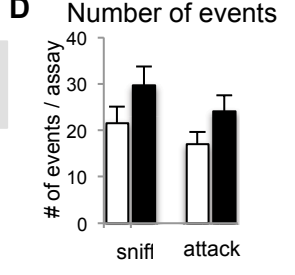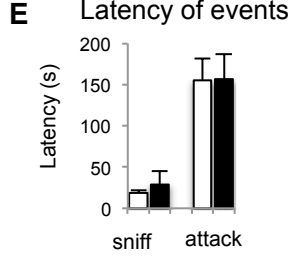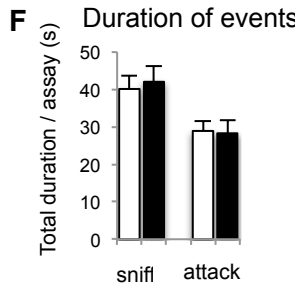

**Olfaction**

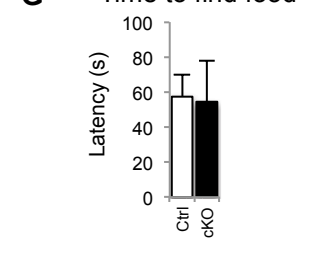

**Urine marking**

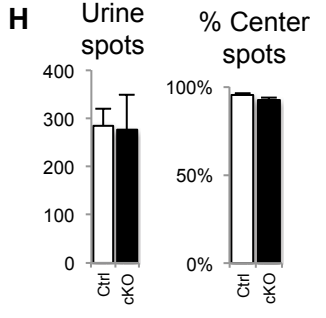

**Female mating behavior**

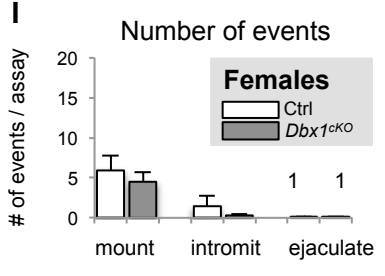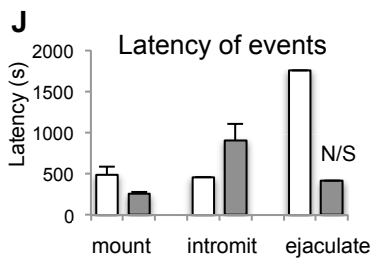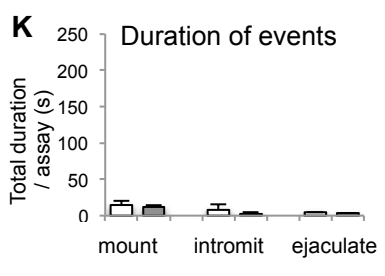

**Maternal aggression**

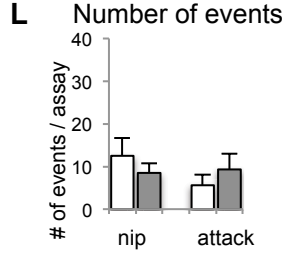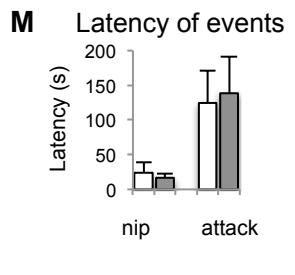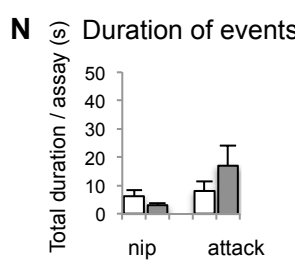

**Olfaction**

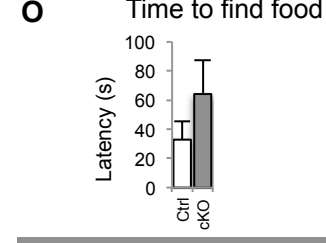

**Urine marking**

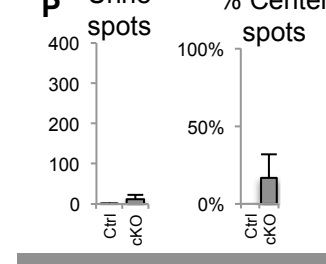

**Pup retrieval**

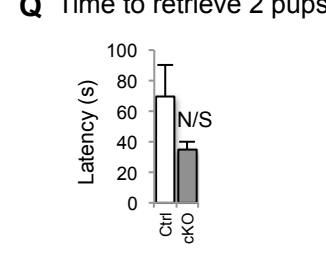

Supplement: NIHMS672367-supplement-4.pdf [file NIHMS672367-supplement-4.pdf]
